# Supplementary material for: Coronary calcification measures predict mortality in symptomatic women and men
Source: PubMed Central journal article supplement — Open Heart. 2022 Dec 29;9(2):e002005. doi: 10.1136/openhrt-2022-002005 (PMC9806039; doi:10.1136/openhrt-2022-002005), 2022-12-29
Supplement: openhrt-2022-002005supp001.pdf [file openhrt-2022-002005supp001.pdf]

## Supplemental material

|                                             |                                    | <b>CACS = 0</b> | <b>CACS 1-100</b> | <b>CACS 101-400</b> | <b>CACS &gt;400</b> |
|---------------------------------------------|------------------------------------|-----------------|-------------------|---------------------|---------------------|
| <b>Women</b>                                | <b>n</b>                           | 1387            | 899               | 340                 | 167                 |
|                                             | <b>Age in years (mean (SD))</b>    | 56 (7)          | 62 (8)            | 64 (8)              | 67 (8)              |
|                                             | <b>Body mass index (mean (SD))</b> | 26 (5)          | 27 (5)            | 27 (5)              | 27 (5)              |
|                                             | <b>Smoking status, n (%)</b>       |                 |                   |                     |                     |
|                                             | Current                            | 441 (34)        | 270 (32)          | 99 (32)             | 49 (31)             |
|                                             | Former                             | 383 (30)        | 301 (36)          | 129 (42)            | 62 (40)             |
|                                             | Never                              | 465 (36)        | 262 (32)          | 82 (27)             | 45 (29)             |
|                                             | <b>Diabetes Mellitus, n (%)</b>    | 78 (6)          | 75 (8)            | 30 (9)              | 30 (18)             |
|                                             | <b>Hypertension, n (%)</b>         | 349 (25)        | 352 (39)          | 164 (48)            | 89 (53)             |
|                                             | <b>Dyslipidemia, n (%)</b>         | 167 (12)        | 179 (20)          | 82 (24)             | 49 (29)             |
|                                             | <b>Degree of stenosis, n (%)</b>   |                 |                   |                     |                     |
|                                             | 0 %                                | 432 (92)        | 82 (14)           | 11 (4)              | <10                 |
|                                             | 1%-49%                             | 34 (7)          | 399 (68)          | 110 (44)            | 15-20               |
|                                             | 50%-70%                            | <10             | 65 (11)           | 74 (30)             | 23 (30)             |
| >70%                                        | <10                                | 39 (7)          | 56 (22)           | 32 (42)             |                     |
| <b>Examinations during follow-up, n (%)</b> |                                    |                 |                   |                     |                     |
| At least one CAG                            | 10-15                              | 90 (10)         | 114 (34)          | 90 (54)             |                     |
| At least one PCI or CABG                    | <10                                | 24 (3)          | 23 (7)            | 41 (25)             |                     |
| <b>All-cause mortality</b>                  | 14 (1)                             | 18 (2)          | 12 (4)            | <10                 |                     |
| <b>Years of follow up (median [IQR])</b>    | 4.6 [3.2, 6.5]                     | 4.4 [3.1, 6.3]  | 4.3 [3.0, 6.0]    | 4.3 [3.1, 5.9]      |                     |
| <b>Men</b>                                  | <b>n</b>                           | 569             | 774               | 436                 | 413                 |
|                                             | <b>Age in years (mean (SD))</b>    | 54 (7)          | 58 (8)            | 61 (8)              | 64 (7)              |
|                                             | <b>Body mass index (mean (SD))</b> | 27 (4)          | 27 (4)            | 27 (4)              | 27 (4)              |
|                                             | <b>Smoking status, n (%)</b>       |                 |                   |                     |                     |
|                                             | Current                            | 165 (32)        | 217 (30)          | 113 (28)            | 122 (32)            |
|                                             | Former                             | 168 (32)        | 259 (36)          | 174 (42)            | 174 (45)            |
|                                             | Never                              | 191 (37)        | 245 (34)          | 123 (30)            | 91 (24)             |
|                                             | <b>Diabetes Mellitus, n (%)</b>    | 23 (4)          | 64 (8)            | 35 (8)              | 61 (15)             |
|                                             | <b>Hypertension, n (%)</b>         | 113 (20)        | 197 (26)          | 153 (35)            | 164 (40)            |
|                                             | <b>Dyslipidemia, n (%)</b>         | 57 (10)         | 129 (17)          | 85 (20)             | 102 (25)            |
|                                             | <b>Degree of stenosis, n (%)</b>   |                 |                   |                     |                     |
|                                             | 0 %                                | 181 (86.2)      | 68 (12)           | 14 (4)              | <10                 |
|                                             | 1%-49%                             | 25 (12)         | 355 (63)          | 128 (37)            | 40-45               |
|                                             | 50%-70%                            | <10             | 94 (17)           | 109 (31)            | 57 (27)             |
| >70%                                        | <10                                | 48 (9)          | 96 (28)           | 106 (51)            |                     |
| <b>Examinations during follow-up, n (%)</b> |                                    |                 |                   |                     |                     |
| At least one CAG                            | <10                                | 109 (14)        | 147 (34)          | 239 (58)            |                     |
| At least one PCI or CABG                    | <10                                | 38 (5)          | 67 (15)           | 111 (27)            |                     |
| <b>All-cause mortality</b>                  | <10                                | 23 (3)          | 14 (3)            | 20 (5)              |                     |
| <b>Years of follow up (median [IQR])</b>    | 4.7 [3.3, 6.4]                     | 4.4 [3.0, 6.2]  | 4 [3, 6]          | 4 [3, 6]            |                     |

**Supplementary Table 1.** Baseline characteristics of study population per sex stratified per CACS category. Abbreviations: CACS, coronary artery calcium score; CAC, coronary artery calcium; CAG, coronary angiography; PCI, percutaneous coronary intervention; CABG, coronary artery bypass graft.

|                                               | <i>Model</i>                               | <i>n</i> | <i>Events</i>  | <i>HR (95%CI)</i> | <i>C-statistic (95%CI)</i> |
|-----------------------------------------------|--------------------------------------------|----------|----------------|-------------------|----------------------------|
| European women                                | <b>Absolute CACS</b>                       |          |                |                   |                            |
|                                               | Continuous                                 | 2411     | 47             | 1.0 (1.0-1.0)     | 0.67 (0.59-0.76)           |
|                                               | Categorized                                |          |                |                   | 0.67 (0.59-0.75)           |
|                                               | CACS 0                                     | 1185     | 11             | reference         |                            |
|                                               | CACS 1-100                                 | 773      | 16             | 2.9 (1.1-5.2)     |                            |
|                                               | CACS 101-400                               | 304      | 12             | 5.0 (2.2-11.3)    |                            |
|                                               | CACS > 400                                 | 149      | <10            | 6.3 (2.5-15.7)    |                            |
|                                               | <b>MESA percentiles</b>                    |          |                |                   |                            |
|                                               | Continuous, adjusted for any calcification | 2411     | 47             |                   | 0.61 (0.58-0.75)           |
|                                               | MESA percentile                            |          |                | 0.4 (0.1-1.7)     |                            |
| Any calcification                             |                                            |          | 6.9 (2.0-23.7) |                   |                            |
| Categorized                                   |                                            |          |                | 0.66 (0.58-0.74)  |                            |
| No calcification                              | 1185                                       | 11       | reference      |                   |                            |
| <75 <sup>th</sup> percentile                  | 466                                        | 16       | 3.8 (1.8-8.3)  |                   |                            |
| 75 <sup>th</sup> -90 <sup>th</sup> percentile | 386                                        | 11       | 3.4 (1.5-8.0)  |                   |                            |
| >90 <sup>th</sup> percentile                  | 374                                        | <10      | 3.0 (1.2-7.1)  |                   |                            |
| European men                                  | <b>Absolute CACS</b>                       |          |                |                   |                            |
|                                               | Continuous                                 | 1898     | 57             | 1.0 (1.0-1.0)     | 0.64 (0.56-0.72)           |
|                                               | Categorized                                |          |                |                   | 0.62 (0.55-0.70)           |
|                                               | CACS 0                                     | 480      | <10            | reference         |                            |
|                                               | CACS 1-100                                 | 665      | 20             | 3.9 (1.3-11.3)    |                            |
|                                               | CACS 101-400                               | 380      | 13             | 4.4 (1.4-13.6)    |                            |
|                                               | CACS > 400                                 | 373      | 20             | 7.1 (2.4-20.7)    |                            |
|                                               | <b>MESA percentiles</b>                    |          |                |                   |                            |
|                                               | Continuous, adjusted for any calcification | 1898     | 57             |                   | 0.59 (0.51-0.67)           |
|                                               | MESA percentile                            |          |                | 0.5 (0.2-1.7)     |                            |
| Any calcification                             |                                            |          | 7.3 (2.1-25.6) |                   |                            |
| Categorized                                   |                                            |          |                | 0.62 (0.55-0.69)  |                            |
| No calcification                              | 480                                        | <10      | reference      |                   |                            |
| <75 <sup>th</sup> percentile                  | 763                                        | 30       | 5.1 (1.8-14.5) |                   |                            |
| 75 <sup>th</sup> -90 <sup>th</sup> percentile | 360                                        | <10      | 3.3 (1.0-10.6) |                   |                            |
| >90 <sup>th</sup> percentile                  | 295                                        | 14       | 6.1 (2.0-18.6) |                   |                            |

**Supplementary Table 2.** Mortality prediction as a function of absolute and age-, sex- and ethnicity specific percentiles of CACS in women (above) and men (below), only performed in European women and men.

|                                        | <b>CT population</b> | <b>Subgroup with CTA</b> |
|----------------------------------------|----------------------|--------------------------|
| <b>n</b>                               | 4985                 | 2715                     |
| <b>Female sex, n (%)</b>               | 2793 (56)            | 1385 (51)                |
| <b>Age in years (mean (SD))</b>        | 59 (8)               | 59.66 (8)                |
| <b>Body mass index (mean (SD))</b>     | 27 (4)               | 26.68 (4)                |
| <b>Complaints, n (%)</b>               | 2683 (54)            | 1499 (55)                |
| <b>Chest pain or discomfort</b>        | 538 (11)             | 295 (11)                 |
| Dyspnoea                               | 172 (4)              | 93 (3)                   |
| Fatigue                                | 463 (9)              | 272 (10)                 |
| Palpitations                           | 27 (0.5)             | 18 (0.7)                 |
| Collapse                               |                      |                          |
| <b>Smoking status, n (%)</b>           | 1476 (32)            | 809 (32)                 |
| <b>Current</b>                         | 1650 (36)            | 936 (37)                 |
| <b>Former</b>                          | 1504 (33)            | 765 (31)                 |
| <b>Never</b>                           |                      |                          |
| <b>Diabetes Mellitus, n (%)</b>        | 396 (8)              | 211 (8)                  |
| <b>Hypertension, n (%)</b>             | 1581 (32)            | 885 (33)                 |
| <b>Dyslipidemia, n (%)</b>             | 850 (17)             | 497 (18)                 |
| <b>CACS score (median [IQR])</b>       | 7.60 [0, 121]        | 34.00 [0, 162]           |
| <b>CACS category, n (%)</b>            | 1956 (39)            | 682 (25)                 |
| 0                                      | 1673 (34)            | 1150 (42)                |
| 1-100                                  | 776 (16)             | 598 (22)                 |
| 101-400                                | 580 (12)             | 285 (11)                 |
| >400                                   |                      |                          |
| <b>All-cause mortality, n (%)</b>      | 116 (2)              | 68 (3)                   |
| <b>Cardiovascular mortality, n (%)</b> | 22 (0.4)             | 10 (0.4)                 |

**Supplementary Table 3.** Direct comparison of CT and CTA population. Abbreviations: CT, computed tomography; CTA, computed tomographic angiography; CACS, coronary artery calcium score.

|                                             |                                    | <b>CACS = 0</b> | <b>CACS 1-100</b> | <b>CACS 101-400</b> | <b>CACS &gt;400</b> |
|---------------------------------------------|------------------------------------|-----------------|-------------------|---------------------|---------------------|
| <b>Women</b>                                | <b>n</b>                           | 472             | 585               | 251                 | 77                  |
|                                             | <b>Age in years (mean (SD))</b>    | 55.90 (6.98)    | 61.32 (7.68)      | 64.49 (7.70)        | 66.45 (7.99)        |
|                                             | <b>Body mass index (mean (SD))</b> | 26.22 (4.82)    | 26.71 (4.90)      | 27.19 (5.24)        | 26.90 (4.31)        |
|                                             | <b>Smoking status, n (%)</b>       | 168 (39)        | 173 (32)          | 68 (29)             | 19 (27)             |
|                                             | Current                            | 136 (32)        | 200 (37)          | 99 (43)             | 26 (37)             |
|                                             | Former                             | 123 (29)        | 166 (31)          | 66 (28)             | 25 (36)             |
|                                             | Never                              |                 |                   |                     |                     |
|                                             | <b>Diabetes Mellitus, n (%)</b>    | 22 (5)          | 43 (7)            | 21 (8)              | 10-15 (13-19)       |
|                                             | <b>Hypertension, n (%)</b>         | 135 (29)        | 221 (38)          | 122 (49)            | 40 (52)             |
|                                             | <b>Dyslipidemia, n (%)</b>         | 64 (14)         | 110 (19)          | 66 (26)             | 23 (30)             |
|                                             | <b>Degree of stenosis, n (%)</b>   | 432 (92)        | 82 (14)           | 11 (4)              | <10 (<13)           |
|                                             | 0 %                                | 34 (7)          | 399 (68)          | 110 (44)            | 20-25 (25-32)       |
|                                             | 1%-49%                             | <10 (<2)        | 65 (11)           | 74 (30)             | 23 (30)             |
|                                             | 50%-70%                            | <10 (<2)        | 39 (7)            | 56 (22)             | 32 (42)             |
| >70%                                        |                                    |                 |                   |                     |                     |
| <b>Examinations during follow-up, n (%)</b> | <10 (<2)                           | 72 (12)         | 96 (38)           | 32 (42)             |                     |
| At least one CAG                            | <10 (<2)                           | 23 (4)          | 22 (9)            | 20 (26)             |                     |
| At least one PCI or CABG                    |                                    |                 |                   |                     |                     |
| <b>All-cause mortality</b>                  | <10 (<2)                           | <10 (<2)        | <10 (<4)          | <10 (<13)           |                     |
| <b>Years of follow up (median [IQR])</b>    | 5 [3, 7]                           | 4 [3, 6]        | 4 [3, 6]          | 4 [3, 5]            |                     |
| <b>Men</b>                                  | <b>n</b>                           | 210             | 565               | 347                 | 208                 |
|                                             | <b>Age in years (mean (SD))</b>    | 53.71 (6.40)    | 58.13 (7.69)      | 60.98 (8.05)        | 63.19 (7.55)        |
|                                             | <b>Body mass index (mean (SD))</b> | 26.49 (4.03)    | 26.83 (3.67)      | 26.79 (3.79)        | 26.51 (3.42)        |
|                                             | <b>Smoking status, n (%)</b>       | 75 (40)         | 160 (30)          | 85 (26)             | 61 (32)             |
|                                             | Current                            | 55 (29)         | 193 (36)          | 146 (45)            | 81 (42)             |
|                                             | Former                             | 57 (31)         | 181 (34)          | 96 (29)             | 51 (26)             |
|                                             | Never                              |                 |                   |                     |                     |
|                                             | <b>Diabetes Mellitus, n (%)</b>    | <10             | 48 (9)            | 28 (8)              | 29 (14)             |
|                                             | <b>Hypertension, n (%)</b>         | 34 (16)         | 143 (25)          | 118 (34)            | 72 (35)             |
|                                             | <b>Dyslipidemia, n (%)</b>         | 23 (11)         | 94 (17)           | 65 (19)             | 52 (25)             |
|                                             | <b>Degree of stenosis, n (%)</b>   | 181 (86)        | 68 (12)           | 14 (4)              | <10 (<4)            |
|                                             | 0 %                                | 25 (12)         | 355 (63)          | 128 (37)            | 40-45 (19-22)       |
|                                             | 1%-49%                             | <10 (<4)        | 94 (17)           | 109 (31)            | 57 (27)             |
|                                             | 50%-70%                            | <10 (<4)        | 48 (9)            | 96 (28)             | 106 (51)            |
| >70%                                        |                                    |                 |                   |                     |                     |
| <b>Examinations during follow-up, n (%)</b> | <10 (<4)                           | 92 (16)         | 127 (37)          | 123 (59)            |                     |
| At least one CAG                            | <10 (<4)                           | 33 (6)          | 61 (18)           | 73 (35)             |                     |
| At least one PCI or CABG                    |                                    |                 |                   |                     |                     |
| <b>All-cause mortality</b>                  | <10 (<4)                           | 21 (4)          | 12 (4)            | 12 (6)              |                     |
| <b>Years of follow up (median [IQR])</b>    | 5 [4, 7]                           | 4 [3, 6]        | 5 [3, 6]          | 4 [3, 6]            |                     |

**Supplementary Table 4.** Baseline characteristics of CTA study population per sex stratified per CACS category. Abbreviations: CACS, coronary artery calcium score; CAC, coronary artery calcium; CAG, coronary angiography; PCI, percutaneous coronary intervention; CABG, coronary artery bypass graft.
